# Supplementary material for: Expression of Human Endogenous Retrovirus env Genes in the Blood of Breast Cancer Patients
Source: PubMed Central journal article supplement (PMC4100088; doi:10.3390/ijms15069173), 2014-05-26

# Supplementary Information

Figure S1. Comparative melt curves of all amplified products.

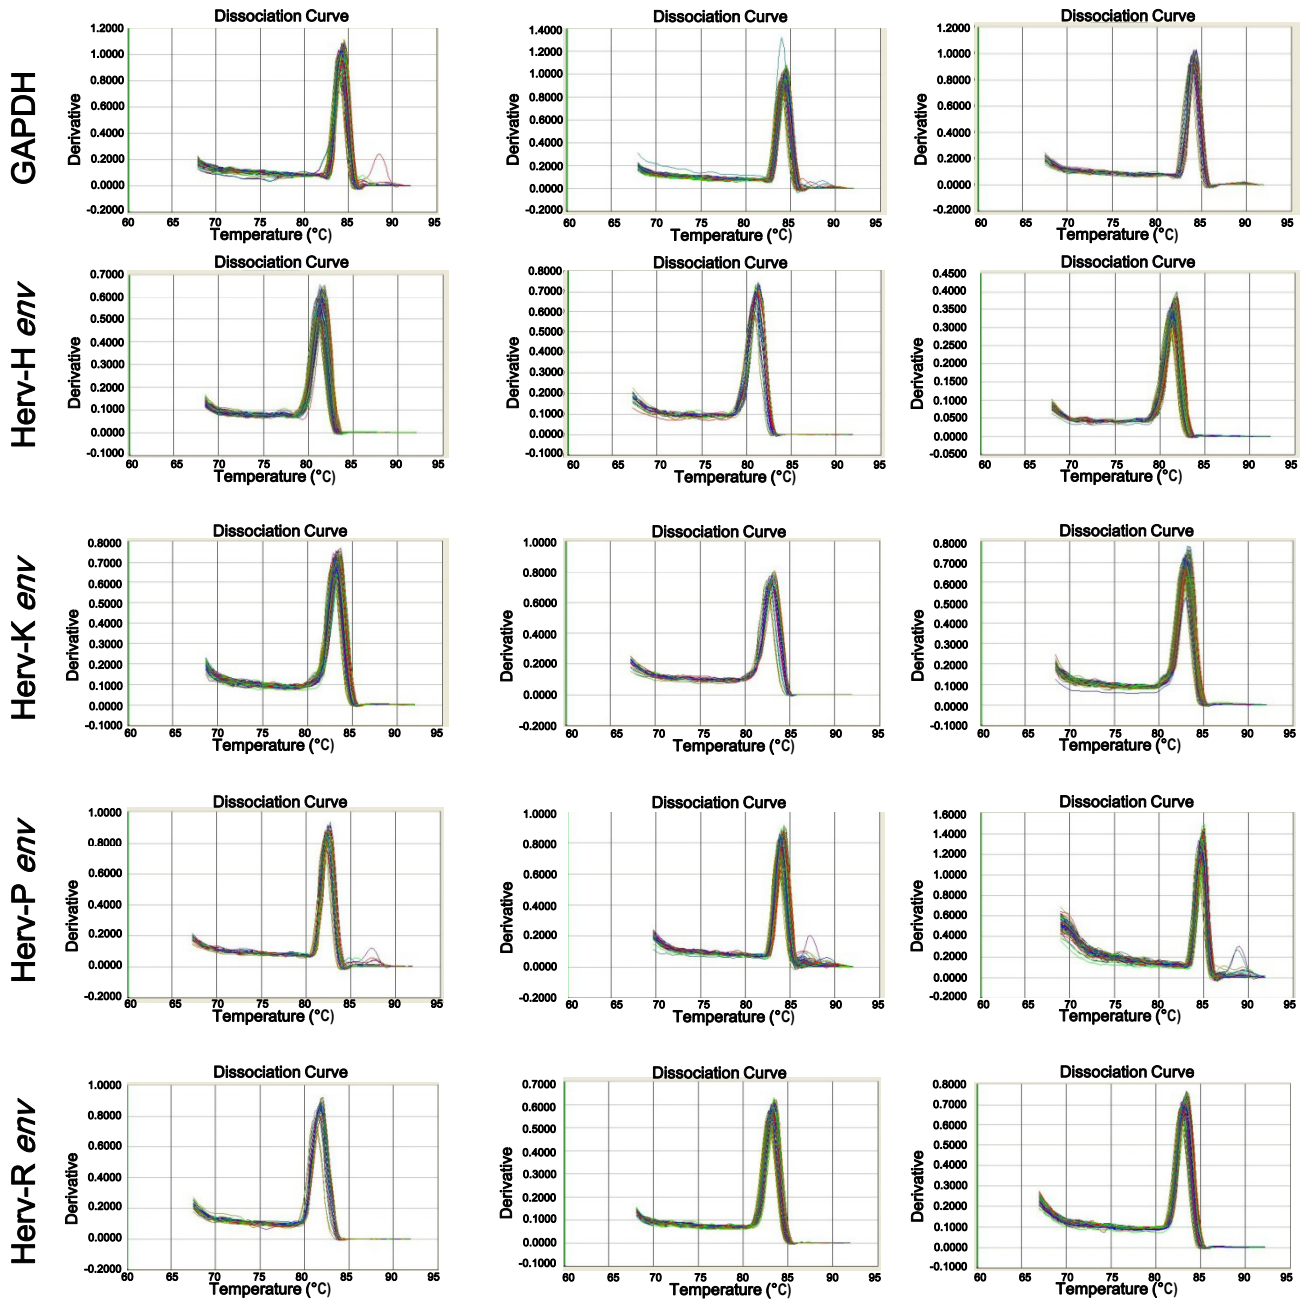

Supplement: ijms-15-09173-s001.pdf [file ijms-15-09173-s001.pdf]
